# Supplementary material for: On the Effect of pH, Temperature, and Surfactant Structure on Bovine Serum Albumin–Cationic/Anionic/Nonionic Surfactants Interactions in Cacodylate Buffer–Fluorescence Quenching Studies Supported by UV Spectrophotometry and CD Spectroscopy
Source: MDPI journal article supplement (doi:10.3390/ijms23010041), 2021-12-21
Supplement: s1 [file s1]

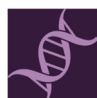

Article

# On the Effect of pH, Temperature, and Surfactant Structure on Bovine Serum Albumin–Cationic/Anionic/Nonionic Surfactants Interactions in Cacodylate Buffer–Fluorescence Quenching Studies Supported by UV Spectrophotometry and CD Spectroscopy

Krzysztof Żamojć \*, Dariusz Wyrzykowski and Lech Chmurzyński

## Electronic Supplementary Information

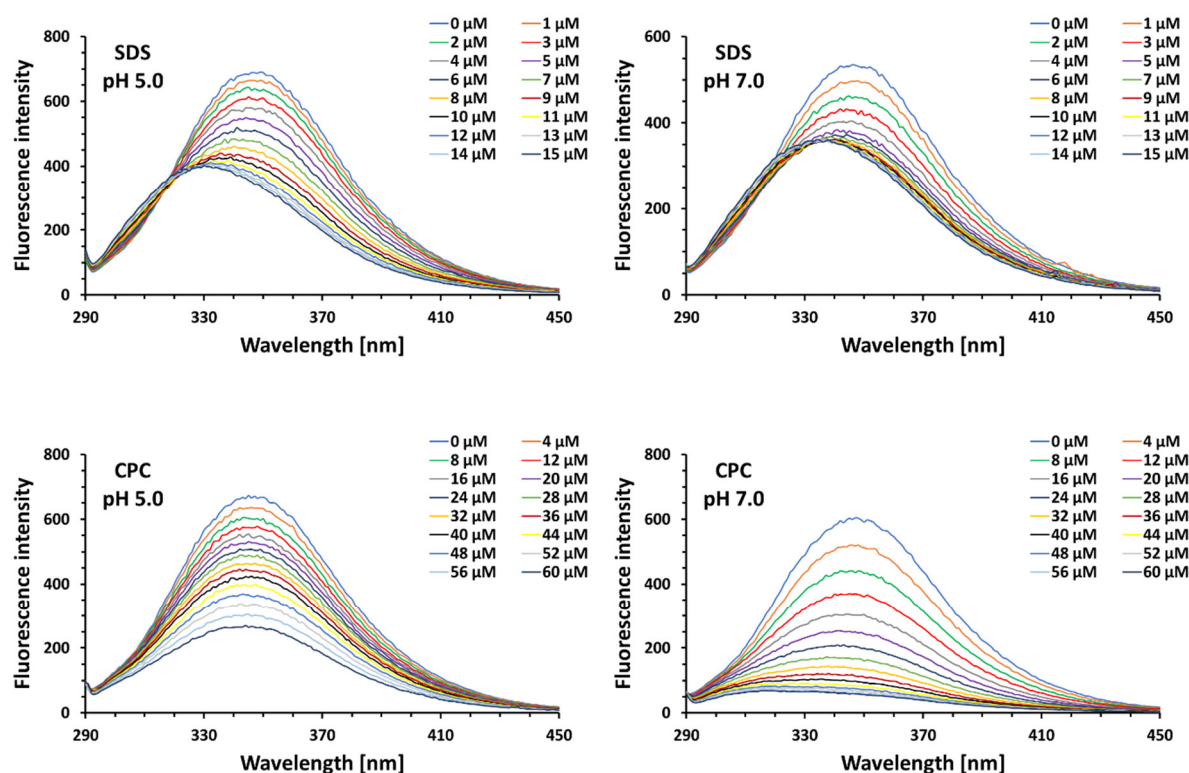

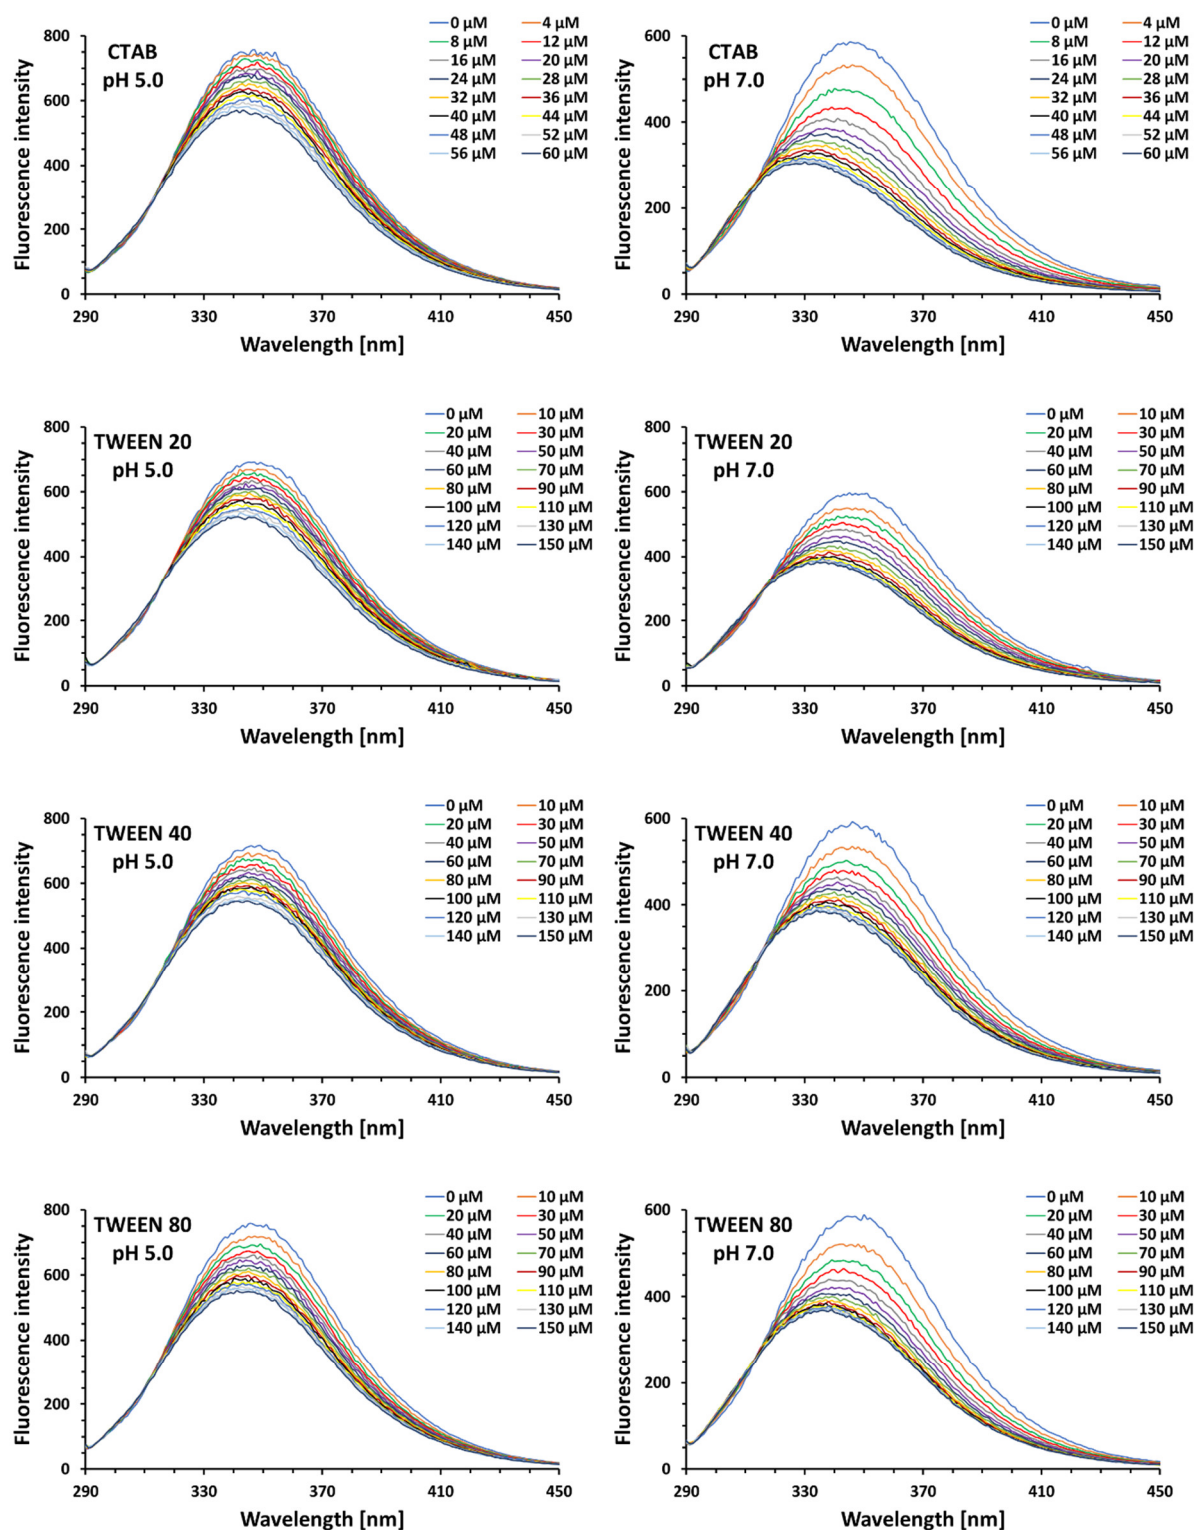

**Figure S1.** Fluorescence emission spectra of BSA (2  $\mu\text{M}$ ) in the presence of increasing concentrations of the studied surfactants in 10 mM CACO buffer of pH 5.0 and 7.0 at 298 K;  $\lambda_{\text{ex}} = 280 \text{ nm}$ .

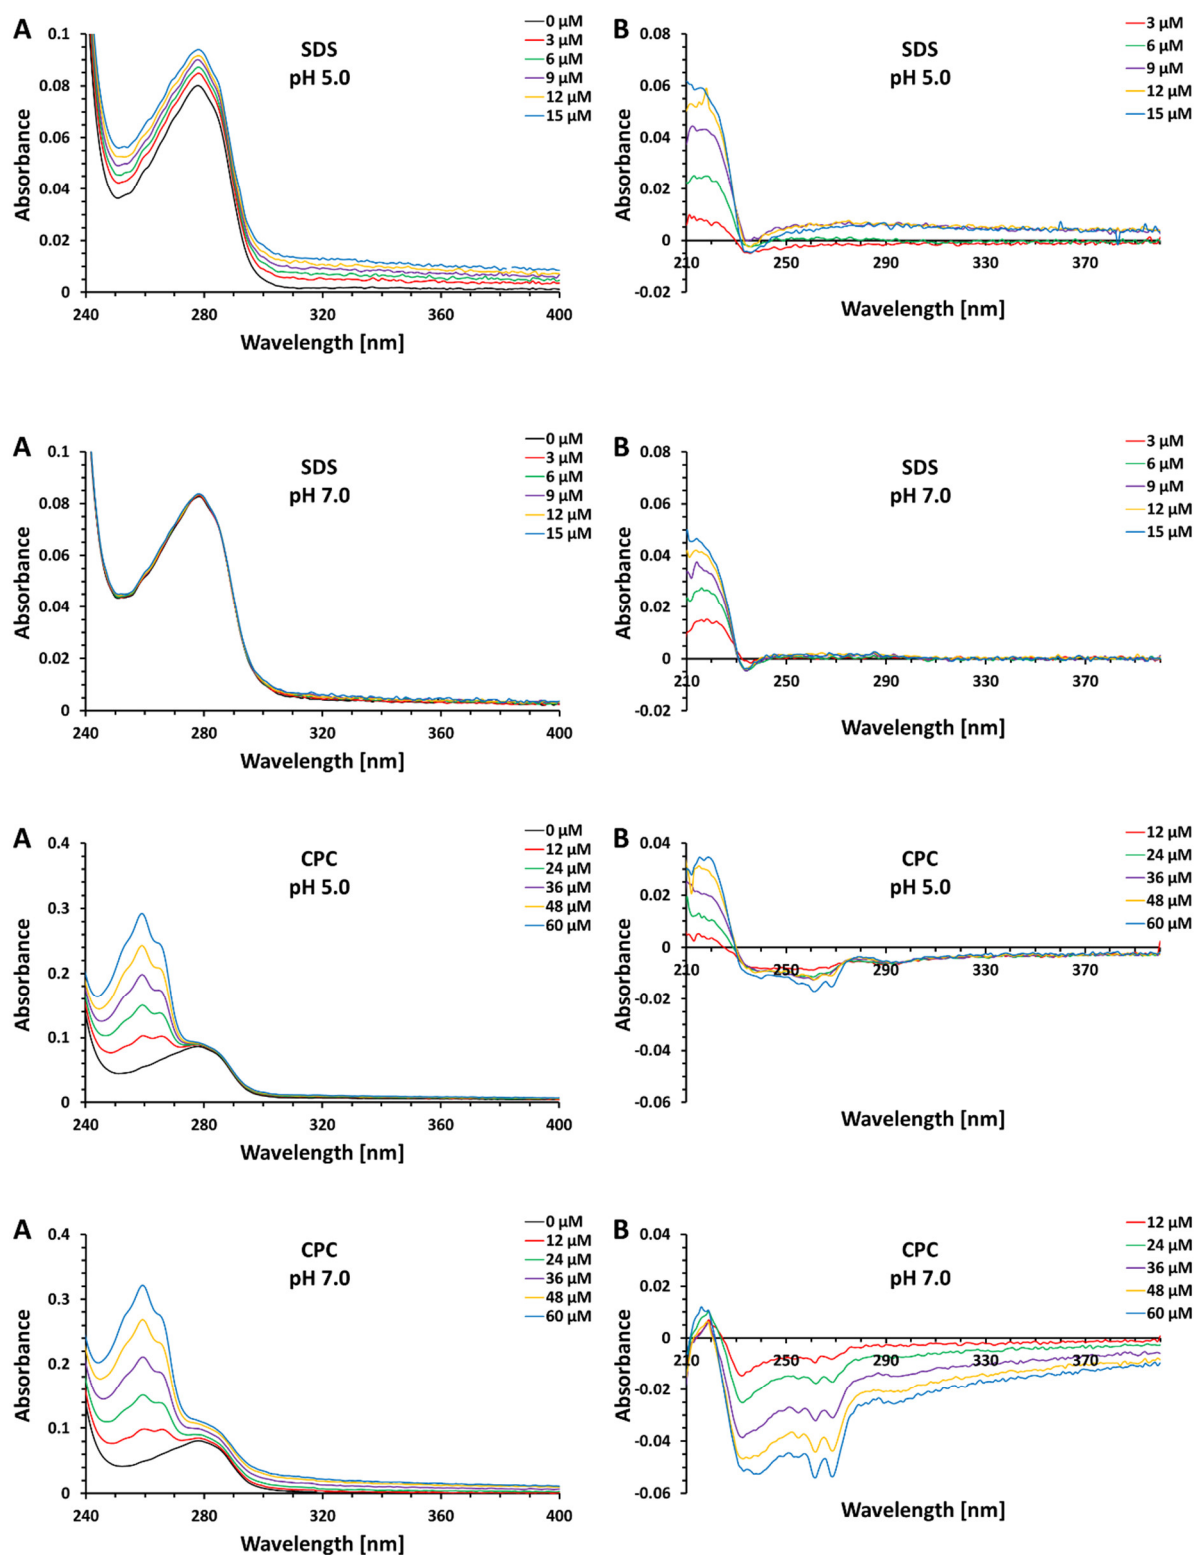

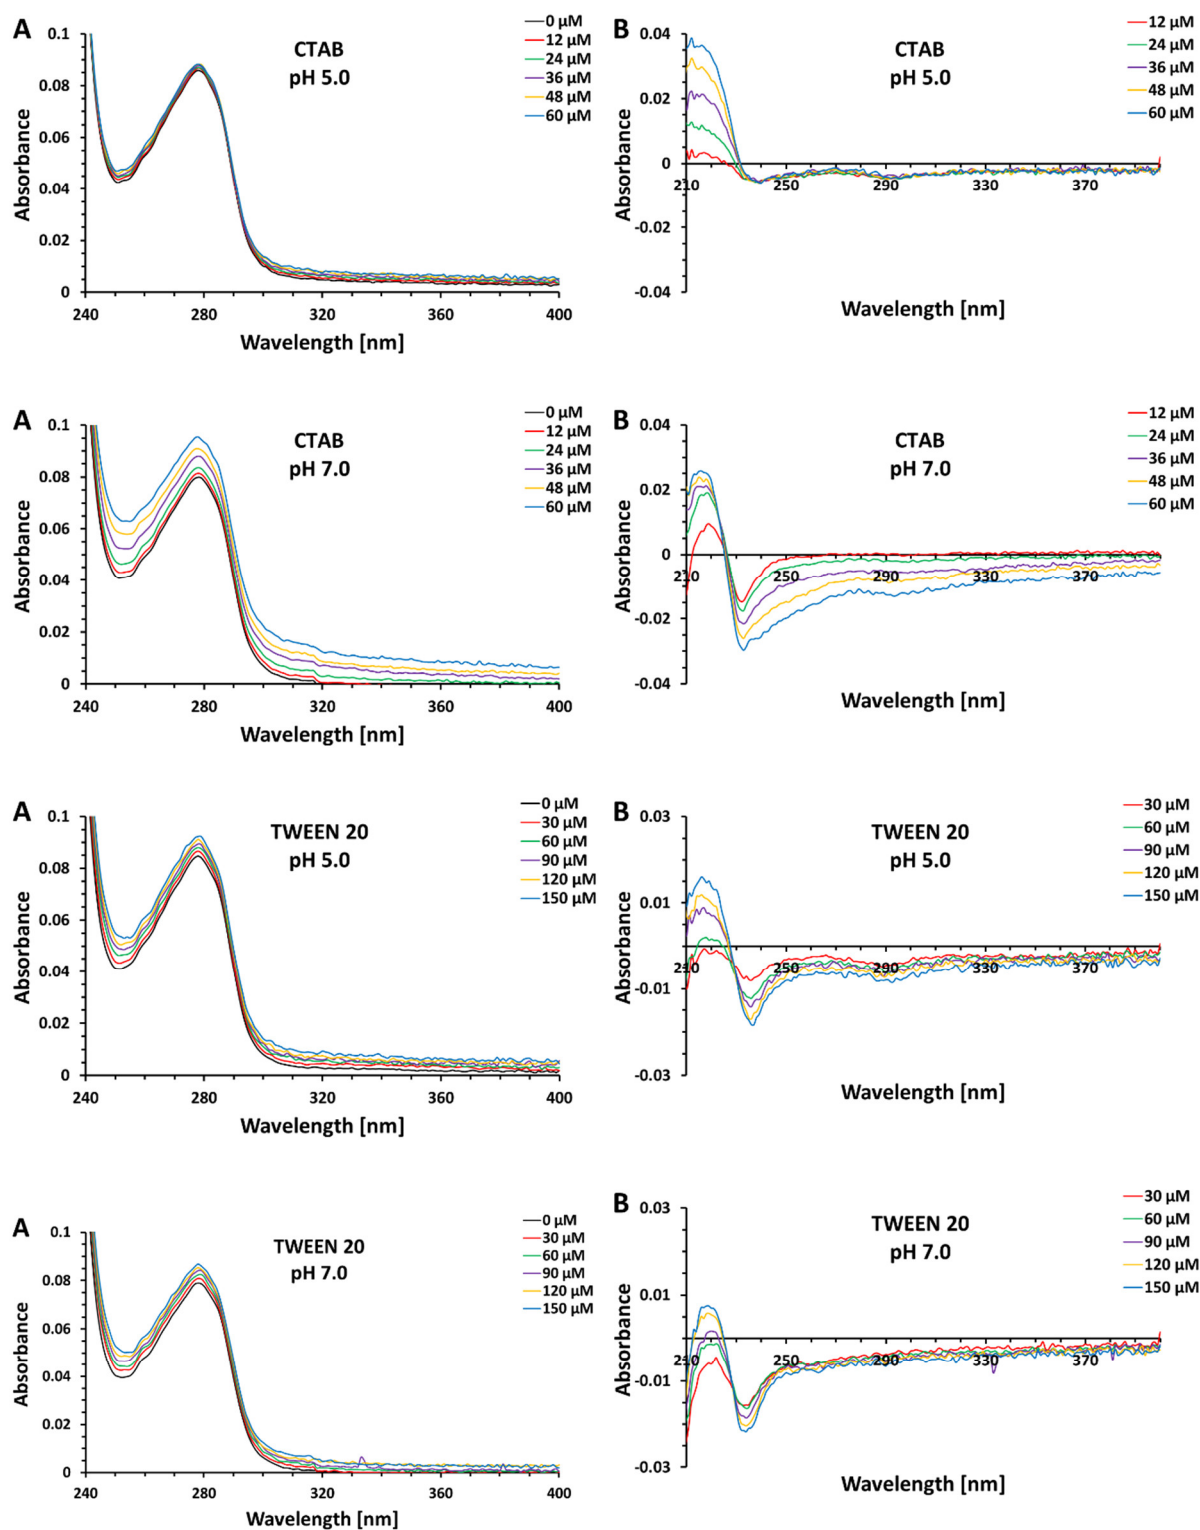

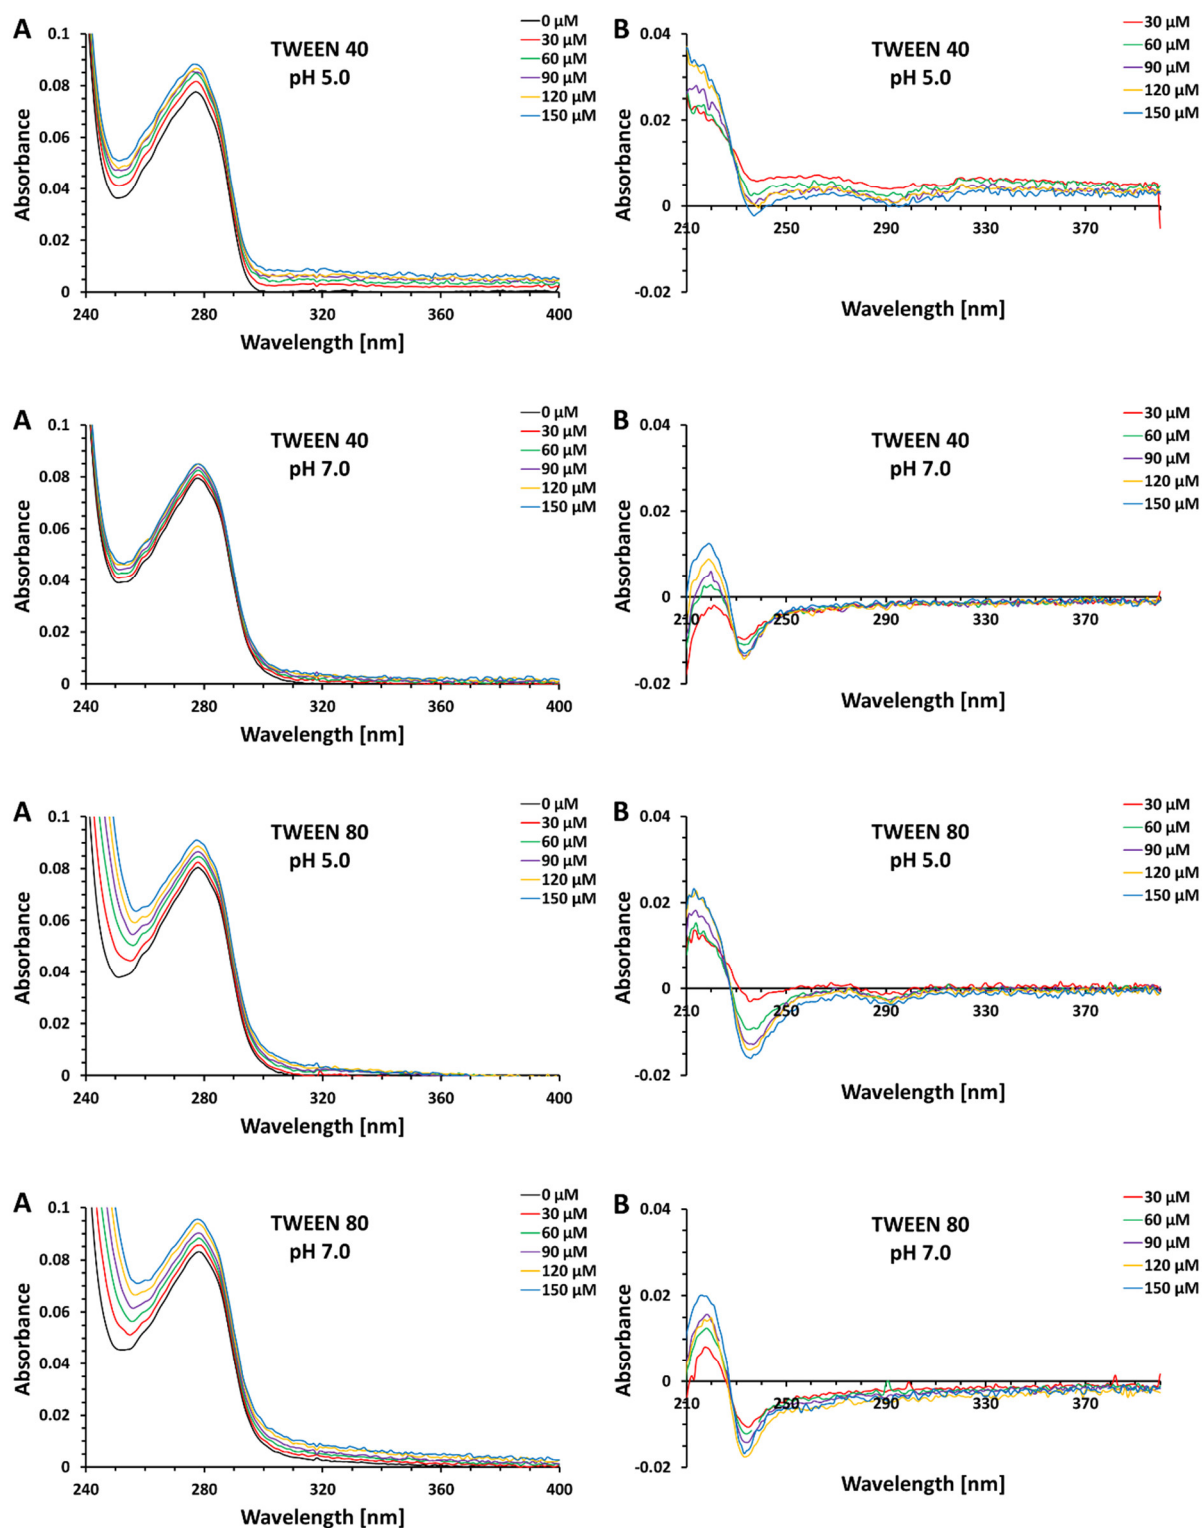

**Figure S2.** UV absorption spectra (A) and difference UV absorption spectra (B) of BSA (2  $\mu\text{M}$ ) in the presence of increasing concentrations of the studied surfactants in 10 mM CACO buffer of pH 5.0 and 7.0 at 298 K.

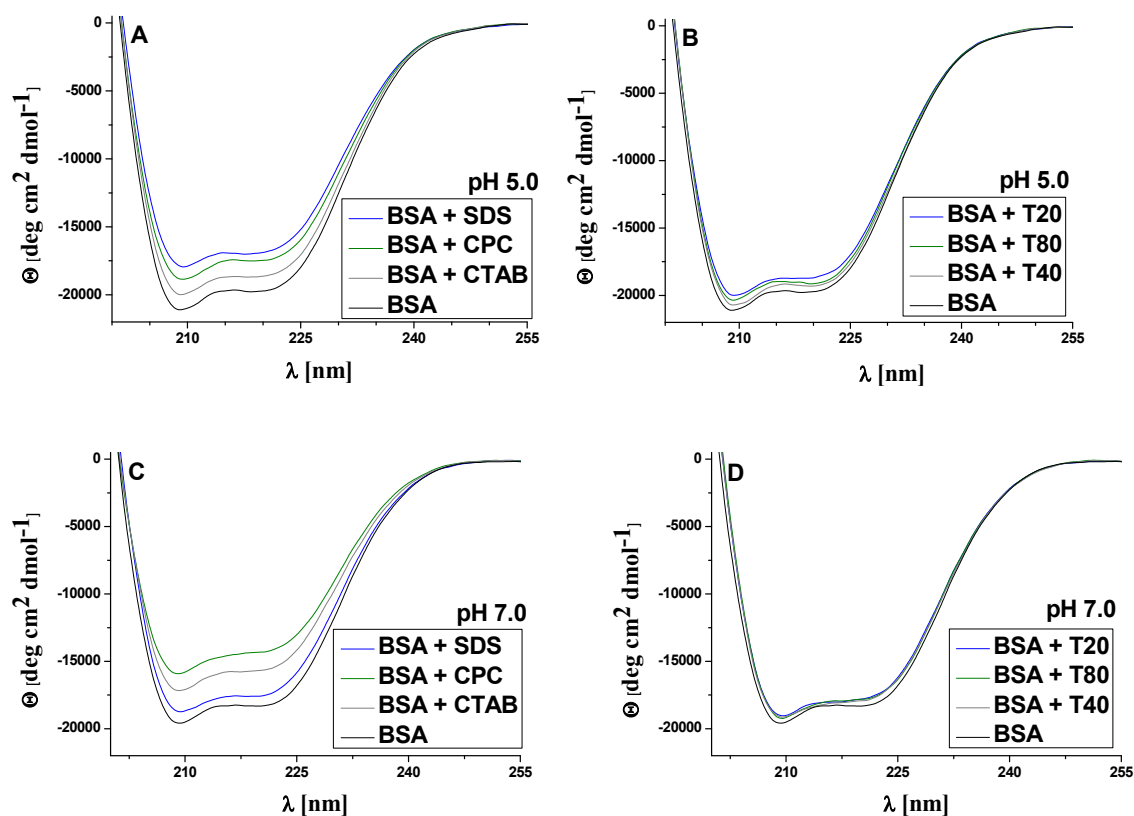

**Figure S3.** The CD spectra of free BSA and the solutions of BSA with the investigated surfactants mixed in 1:7.5 (for SDS), 1:30 (for CPC and CTAB), and 1:75 (for TWEEN 20, TWEEN 40 and TWEEN 80) molar ratios in 10 mM CACO buffer of pH 5.0 (A, B) and 7.0 (C, D) at 298 K.
